# Supplementary material for: Hospital Management and Public Health Role of National Hospitals after Transformation into Independent Administrative Agencies
Source: Healthcare (Basel). 2022 Oct 19;10(10):2084. doi: 10.3390/healthcare10102084 (PMC9602203; doi:10.3390/healthcare10102084)
Supplement: Supplementary file 1 [file healthcare-10-02084-s001.zip › healthcare-1944592-supplementary.pdf]

Table S1. Governance structures of health organizations(detailed).

| Classification by type of establishment       | National Hospital                                                                   | Independent Administrative Agency (National)                                                                                                                                                 | Public Hospital                                         | Local Independent Administrative Agency                  | Private Hospital                                             |
|-----------------------------------------------|-------------------------------------------------------------------------------------|----------------------------------------------------------------------------------------------------------------------------------------------------------------------------------------------|---------------------------------------------------------|----------------------------------------------------------|--------------------------------------------------------------|
| Example                                       | National Defense Medical College Hospital, National Sanatorium for Hansen's Disease | NHO, National University Hospitals, etc.                                                                                                                                                     | Local government hospital                               | Hospitals operated under the Local Public Enterprise Act | Medical corporations, clinics, etc.                          |
| Act on Basis for Establishment                | Law for Establishing Jurisdiction                                                   | Act on General Rules for Incorporated Administrative Agencies. / Act on the National Hospital Organization, Independent Administrative Agency. / Act on the National University Corporation. | Local Public Enterprise Act / Articles of Incorporation | Local Public Enterprise Act / Articles of Incorporation  | Medical Care Act.                                            |
| Establishers                                  | The competent minister                                                              | Chairman of the board of directors                                                                                                                                                           | Head of the local government / Business Manager         | Chairman of the board of directors                       | Chairman of the board of directors / Hospital Administrator  |
| Appointing authority of the establisher       |                                                                                     | The competent minister / Ex. NHO: Minister of Health, Labor and Welfare, National University Hospitals: Ministry of Education, Culture, Sports, Science and Technology.                      | Head of the local government                            | head of the local government                             | Chairman of the board of directors / Hospital Administrators |
| Status of the establisher                     |                                                                                     | Non-government officer                                                                                                                                                                       | Local government officer                                | Non-government officer                                   | Non-government officer                                       |
| Director Appointee                            | The competent minister                                                              | The competent minister                                                                                                                                                                       | —                                                       | Head of the local government                             | Establishers                                                 |
| Method of Election of Executive Board Members | Specialized National Public Servants                                                | The competent minister / Open recruitment                                                                                                                                                    | —                                                       | Head of the local government / Open recruitment          | Board of directors / Establishers                            |

| Classification by type of establishment | National Hospital                              | Independent Administrative Agency (National)                                                                                                                                                                            | Public Hospital                                                                 | Local Independent Administrative Agency                                         | Private Hospital                  |
|-----------------------------------------|------------------------------------------------|-------------------------------------------------------------------------------------------------------------------------------------------------------------------------------------------------------------------------|---------------------------------------------------------------------------------|---------------------------------------------------------------------------------|-----------------------------------|
| Management organization                 | The ministry in charge                         | Board of directors                                                                                                                                                                                                      | Hospital Organization                                                           | Board of directors                                                              | Board of directors / Establishers |
| Operation Plans                         | Hospital Organization / The ministry in charge | Board of directors                                                                                                                                                                                                      | Hospital Organization / Local government that has established                   | Board of directors                                                              | Board of directors / Establishers |
| Approval of operating plan              | The competent minister / Council in charge     | The competent minister / Council in charge                                                                                                                                                                              | Local government that has established                                           | Parliament                                                                      | Board of directors / Establishers |
| Approval of Management Report           | The competent minister / Council in charge     | The competent minister / Council in charge                                                                                                                                                                              | Local government that has established                                           | parliament                                                                      | Board of directors / Establishers |
| Sponsor of a capital                    | National government                            | National government                                                                                                                                                                                                     | Local government that has established                                           | Local government that has established                                           | Own private financial resources   |
| Budget Approval                         | Congress                                       | Board of directors                                                                                                                                                                                                      | parliament                                                                      | Board of directors                                                              | Board of directors / Establishers |
| Financial Repor                         | Congress                                       | The competent minister                                                                                                                                                                                                  | Ministry of Internal Affairs and Communications / Established local governments | Ministry of Internal Affairs and Communications / Established local governments | Board of directors / Establishers |
| Advisory board                          | Council of Ministries and Agencies             | A Committee on the System of Evaluating Incorporated Administrative Agencies are set up within the Ministry of Internal Affairs and Communications. And this committee makes recommendations to the competent minister. | Local Self-Governance Committee                                                 | Local Self-Governance Committee                                                 | Consultant firms, etc.            |
| Investment funds                        | Special Accounts                               | FILP system / Own Assets                                                                                                                                                                                                | Municipal accounting                                                            | FILP system / local government / Bank                                           | Own Assets / Bank                 |

| Classification by type of establishment                                   | National Hospital                                                                                                                                                                                                                                                                                                                                                                                                                                                                                                       | Independent Administrative Agency (National) | Public Hospital              | Local Independent Administrative Agency | Private Hospital                                            |
|---------------------------------------------------------------------------|-------------------------------------------------------------------------------------------------------------------------------------------------------------------------------------------------------------------------------------------------------------------------------------------------------------------------------------------------------------------------------------------------------------------------------------------------------------------------------------------------------------------------|----------------------------------------------|------------------------------|-----------------------------------------|-------------------------------------------------------------|
| Hospital Administrator (Hospital Director)                                | A person who has been registered under Article 16-6, paragraph (1) of the Medical Practitioners' Act as stipulated in Article 7, paragraph (1) of the Medical Care Act.                                                                                                                                                                                                                                                                                                                                                 |                                              |                              |                                         |                                                             |
| Hospital administrator's appointee                                        | The competent minister                                                                                                                                                                                                                                                                                                                                                                                                                                                                                                  | Chairman of the board of directors           | Head of the local government | Chairman of the board of directors      | Chairman of the board of directors / Hospital Administrator |
| Licensor for the establishment of hospitals                               | <p>Prefectural Governor:</p> <p>Licensing of buildings (additions and renovations, changes and additions to medical equipment, use of rooms, changes to room names), number of beds and establishment (ICU, CCU, etc.), and licensing of medical departments.</p> <p>Permission for buildings (additions and renovations, changes and additions to equipment, use of individual rooms, changes to room names), and permission for hospital beds (number of beds, etc.).</p> <p>Permission for a medical speciality.</p> |                                              |                              |                                         |                                                             |
| Limitations of opening                                                    | Prefectural Governor: Must permit if the building structure, equipment and staffing standards are met.                                                                                                                                                                                                                                                                                                                                                                                                                  |                                              |                              |                                         |                                                             |
| Authority to limit the number of hospital beds                            | Prefectural Governor: In principle, within the scope of the regional medical plan drafted in accordance with the Medical Care Act.                                                                                                                                                                                                                                                                                                                                                                                      |                                              |                              |                                         |                                                             |
| Notification related to medical reimbursement under health insurance laws | Regional Health and Welfare Bureau (Ministry of Health, Labour and Welfare)                                                                                                                                                                                                                                                                                                                                                                                                                                             |                                              |                              |                                         |                                                             |

|                                           |                                                                                |                                                                                                                                                                                                                                                                                                                                   |                          |                                         |                    |
|-------------------------------------------|--------------------------------------------------------------------------------|-----------------------------------------------------------------------------------------------------------------------------------------------------------------------------------------------------------------------------------------------------------------------------------------------------------------------------------|--------------------------|-----------------------------------------|--------------------|
| Classification by type of establishment   | National Hospital                                                              | Independent Administrative Agency (National)                                                                                                                                                                                                                                                                                      | Public Hospital          | Local Independent Administrative Agency | Private Hospital   |
| Status of Employees                       | Government officer                                                             | Private                                                                                                                                                                                                                                                                                                                           | Local government officer | Private                                 | Private            |
| Status under the Criminal Code            | Government officer                                                             | Public officer                                                                                                                                                                                                                                                                                                                    | Local government officer | Private                                 | Private            |
| Government's right to command and control | Has command and control authority.                                             | Depends on the Act. / Ex. The Minister of Health, Labor and Welfare may request the implementation of operations in the event of a disaster or public health crisis as defined in Article 21.1 of the Act on the National Hospital Organization, Independent Administrative Agency.                                               | —                        | —                                       | —                  |
| Operational Supervisory Authority         | The competent minister                                                         | Prefectural Governor: Comply with the provisions of Section 3 of the Medical Care Act (staffing, sanitation, compliance with laws and regulations)                                                                                                                                                                                |                          |                                         |                    |
| Public audits on insurance treatment      | Regional Bureau of Health and Welfare (Ministry of Health, Labour and Welfare) |                                                                                                                                                                                                                                                                                                                                   |                          |                                         |                    |
| Surplus Profit                            | Surpluses must in principle be paid into the national treasury                 | Surpluses after the end of the medium-term target period are managed by the agency for the next medium-term target period if they are approved by the competent minister, and if permission is not granted, the part of the surplus that has not been planned for use in the next plan must be returned to the national treasury. | Local government         | Transfer of assets                      | Transfer of assets |

Table S2. Final review of the medium-term management plan(detailed).

| Target item                                                                                                   |                   |                                     |                                                                         |                                                              | Final review of medium-term |  |                 |  |                 |  |
|---------------------------------------------------------------------------------------------------------------|-------------------|-------------------------------------|-------------------------------------------------------------------------|--------------------------------------------------------------|-----------------------------|--|-----------------|--|-----------------|--|
| Medium-term plan                                                                                              |                   |                                     |                                                                         |                                                              | 1st                         |  | 2nd             |  | 3rd             |  |
| I . Matters concerning the improvement of the quality of services and other operations provided to the public |                   |                                     |                                                                         |                                                              |                             |  |                 |  |                 |  |
|                                                                                                               | Clinical Services |                                     |                                                                         |                                                              |                             |  |                 |  |                 |  |
|                                                                                                               |                   | Providing Medical Care              |                                                                         |                                                              |                             |  |                 |  |                 |  |
|                                                                                                               |                   | Patient Satisfaction Survey         | Increase in average satisfaction points                                 | Inpatients                                                   | 4,310pt→4,508pt             |  | 4,508pt→4,545pt |  | 4,549pt→4,554pt |  |
|                                                                                                               |                   |                                     |                                                                         | Outpatient                                                   | 3,920pt→4,097pt             |  |                 |  |                 |  |
|                                                                                                               |                   | Clinical-Path                       | The number of completed clinical-path                                   | Increase in variety                                          | 5.2k→7.5K                   |  | —               |  | —               |  |
|                                                                                                               |                   |                                     | The number of cases conducted                                           | Increase in the number of cases                              | 126.8K→243.7K               |  | 243.7K→288.4K   |  | 288.4K→319.7K   |  |
|                                                                                                               |                   | Second Opinion                      | The number of hospitals implementing the Program                        | Increase in the number of hospitals implementing the program | 45→129                      |  | 129→143         |  | —               |  |
|                                                                                                               |                   |                                     | The number of cases conducted                                           | Increase in the number of cases                              | 1,228→2,928                 |  | 2,928→3,480     |  | —               |  |
|                                                                                                               |                   | Issue of Statements of Account      | The number of hospitals with Issuing system in place                    | Inpatients                                                   | 59→70                       |  | —               |  | —               |  |
|                                                                                                               |                   |                                     |                                                                         | Outpatient                                                   | 52→66                       |  | —               |  | —               |  |
|                                                                                                               |                   |                                     | Issuance of a statement clearly indicating individual calculation items | Increase in the number of hospitals implementing issuance    | —                           |  | 8→143           |  | —               |  |
|                                                                                                               |                   | Assignment of Medical Social Worker | The number of deployments                                               | The number of hospitals                                      | 55→113                      |  | 113→137         |  | 137→137         |  |
|                                                                                                               |                   |                                     |                                                                         | The number of deployments                                    | 71→229                      |  | A               |  | 229→412         |  |

| Target item      |  |  |                                                    |                                                              | Final review of medium-term                 |           |     |             |     |                                                                         |
|------------------|--|--|----------------------------------------------------|--------------------------------------------------------------|---------------------------------------------|-----------|-----|-------------|-----|-------------------------------------------------------------------------|
| Medium-term plan |  |  |                                                    |                                                              | 1st                                         |           | 2nd |             | 3rd |                                                                         |
|                  |  |  | Committee for Quality Improvement of Health Care   | The number of hospitals                                      | Installation in all facilities              | —         |     | —           |     | 5→141                                                                   |
|                  |  |  | Ordinary Income                                    | Ordinary income                                              | Return to profitability in recurring income | —         |     | —           |     | US\$355.5M→<br>US\$126.6M→US\$46.6M<br>→US\$97.1M→                      |
|                  |  |  | The number of Employees                            | The number of employees                                      | The number of employees                     | —         |     | —           |     | 59.3K→60.1K <sup>U</sup> →<br>58.6 <sup>1</sup> 1.1.16K <sup>0</sup> →M |
|                  |  |  | Providing Safe and Reliable Medical Care           |                                                              |                                             |           |     |             |     |                                                                         |
|                  |  |  | Provide a private room where patients can consult. | The number of hospitals that have converted to private rooms |                                             | 105→126   |     | 126→132     |     | —                                                                       |
|                  |  |  | Ethics Review Board                                | Installation and Implementation                              | The number of hospitals with                | 91→all    |     | —           |     | —                                                                       |
|                  |  |  |                                                    |                                                              | The number of times held                    | 382→628   |     | 628→893     |     | Reclassified.                                                           |
|                  |  |  |                                                    |                                                              | The number of cases reviewed                | 1.2K→2.4K |     | 2.4K→4.7K   |     | Reclassified.                                                           |
|                  |  |  | Clinical Trials Review Committee                   | Installation and Implementation                              | The number of hospitals with                | 129→all   |     | —           |     | —                                                                       |
|                  |  |  |                                                    |                                                              | The number of times held                    | —→1.1K    |     | 1.1K→1.0K   |     | Reclassified.                                                           |
|                  |  |  |                                                    |                                                              | The number of cases reviewed                | —→14.0K   |     | 14.0K→14.8K |     | Reclassified.                                                           |

| Target item      |  |  |                                      |                                                               |                                             | Final review of medium-term |  |             |  |             |  |
|------------------|--|--|--------------------------------------|---------------------------------------------------------------|---------------------------------------------|-----------------------------|--|-------------|--|-------------|--|
| Medium-term plan |  |  |                                      |                                                               |                                             | 1st                         |  | 2nd         |  | 3rd         |  |
|                  |  |  | Report of Medical Accident           | Thorough reporting of incidents                               | The number of reported cases                | 112→728                     |  | —           |  | 201→242     |  |
|                  |  |  | Standardization of medical equipment | Limitation of the ventilator to designated models             | Increase in percentage of designated models | 35.4%→54.2%                 |  | 54.2%→89.4% |  | 90.3%→94.5% |  |
|                  |  |  | Hospital infection control           | Installation of ICT                                           | Increase in the number of hospitals         | 97→137                      |  | —           |  | —           |  |
|                  |  |  |                                      | The number of certified infection control nurses              | Increase in the number of nurses            | 33→87                       |  | 87→155      |  | 155→214     |  |
|                  |  |  |                                      | Training on hospital infection control                        | Increase in the number of training          | —                           |  | 618→1,012   |  | 1,012→1,390 |  |
|                  |  |  | Medical Safety                       | The number of new nurses who attended medical safety training | Increase in the number of trainees          | —→3,9K                      |  | 3.9K→7.0K   |  | —           |  |
|                  |  |  |                                      | Conducting medical safety workshops                           | Increase in the number of workshops         | —→22                        |  | 22→14       |  | 14→18       |  |
|                  |  |  |                                      |                                                               | The number of participants                  | —                           |  | 927→486     |  | 486→733     |  |

| Target item      |  |  |                                       |                                                                                            |                                                     | Final review of medium-term        |  |               |  |                                   |  |
|------------------|--|--|---------------------------------------|--------------------------------------------------------------------------------------------|-----------------------------------------------------|------------------------------------|--|---------------|--|-----------------------------------|--|
| Medium-term plan |  |  |                                       |                                                                                            |                                                     | 1st                                |  | 2nd           |  | 3rd                               |  |
|                  |  |  | Specialized and Certified Nurses      | The number of specialized and certified nurses                                             | The number of hospitals with                        | (39→81)                            |  | (86→119)      |  | 119→134                           |  |
|                  |  |  |                                       |                                                                                            | Increase in the number of staff assigned            | (74→285)                           |  | (258→686)     |  | 686→1,103                         |  |
|                  |  |  | Accuracy of Laboratory Data           | Clinical Laboratory Accuracy Management Survey" conducted by the Japan Medical Association | The average value of NHO                            | —                                  |  | —             |  | 98.9→99.0→98.8→98.5→98.3(max 100) |  |
|                  |  |  |                                       |                                                                                            | National average.                                   | —                                  |  | —             |  | 97.3→97.2→97.0→97.1→97.0(max 100) |  |
|                  |  |  | Improvement of emergency medical care | The number of emergency patients accepted                                                  | The number of acceptances                           | 584.1K→618.8K→634.5K→627.7K→564.8K |  | Reclassified. |  | —                                 |  |
|                  |  |  |                                       | The number of pediatric emergency patients accepted                                        | The number of acceptances                           | 165.1K→169.0K→174.6K→160.3K→139.8K |  | Reclassified. |  | —                                 |  |
|                  |  |  |                                       | Emergency and critical care center                                                         | Increase in the number of installations             | 14→17                              |  | Reclassified. |  | —                                 |  |
|                  |  |  |                                       | 24-hour pediatric emergency system                                                         | Increase in the number of well-structured hospitals | 11→17                              |  | Reclassified. |  | —                                 |  |

| Target item      |  |                                                                              |                                               |                                               | Final review of medium-term |   |           |   |               |
|------------------|--|------------------------------------------------------------------------------|-----------------------------------------------|-----------------------------------------------|-----------------------------|---|-----------|---|---------------|
| Medium-term plan |  |                                                                              |                                               |                                               | 1st                         |   | 2nd       |   | 3rd           |
|                  |  | High-Quality Medical Care                                                    |                                               |                                               |                             | S |           | S |               |
|                  |  | Medical Related Workshops                                                    | The number of participants                    | Increase in the number of participants        | 1.8K→2.0K                   |   | 1,7K→1.8K |   | —             |
|                  |  | Assignment of medical care workers                                           | Hospitals where placements were made          | Increase in the number of facilities placed   | —→49                        |   | 49→68     |   | Reclassified. |
|                  |  |                                                                              | The number of people assigned                 | Increase in the number of staff assigned      | —→563                       |   | 563→1,154 |   | Reclassified. |
|                  |  | Day-care facilities for severely mentally and physically handicapped persons | Increase in the number of hospitals installed | Increase in the number of hospitals installed | 21→28                       |   | —         |   | —             |
|                  |  | Medical Care for Tuberculosis                                                | Percentage of domestic medical treatment      | Inpatients                                    | 45%                         |   | —         |   | —             |
|                  |  |                                                                              | Average days in the hospital                  | the shorter average length of hospital stay   | 77.6→73.2                   |   | —         |   | —             |
|                  |  |                                                                              |                                               |                                               |                             |   |           |   | —             |

| Target item      |  |  |                                             |                                              | Final review of medium-term                    |             |     |               |     |                               |
|------------------|--|--|---------------------------------------------|----------------------------------------------|------------------------------------------------|-------------|-----|---------------|-----|-------------------------------|
| Medium-term plan |  |  |                                             |                                              | 1st                                            |             | 2nd |               | 3rd |                               |
|                  |  |  | Rate of referrals                           | Rate of referrals                            | Increase of more than 5 per cent               | 40.5→53.9%  |     | 53.9%→64.7%   |     | Reclassified.                 |
|                  |  |  |                                             | Reverse Referral Rate                        | Increase of more than 5 per cent               | 28.7%→42.7% |     | 42.7%→52.6%   |     | Reclassified.                 |
|                  |  |  | Medical treatment for cancer                | Prefectural cancer treatment center hospital | Increase in the number of center hospitals     | 0→2         |     | Reclassified. |     | —                             |
|                  |  |  |                                             | Regional cancer treatment base hospital      | Increase in the number of base hospitals       | 11→31       |     | Reclassified. |     | —                             |
|                  |  |  | Regional Medical Support Hospital           | Efforts to Designate                         | Increase in the number of designated hospitals | 4→33        |     | Reclassified. |     | —                             |
|                  |  |  | Contribution to National Health Care Policy |                                              |                                                |             |     |               |     |                               |
|                  |  |  | Generic drug                                | Utilization rate based on volume             | Utilization rate                               | —           |     | (16.4%→33.5%) |     | 66.4%→72.7%→78.7%→83.5%→86.2% |
|                  |  |  |                                             | Utilization rate based on the value          | Projected value                                | —           |     |               |     | 60%→60%→70%→70%→70%           |

| Target item      |  |  |                   |                                              |                                      | Final review of medium-term |  |     |  |                |  |
|------------------|--|--|-------------------|----------------------------------------------|--------------------------------------|-----------------------------|--|-----|--|----------------|--|
| Medium-term plan |  |  |                   |                                              |                                      | 1st                         |  | 2nd |  | 3rd            |  |
|                  |  |  | DMAT Training     | Training Implementation                      | Increase in the number of facilities | (7→119)                     |  | —   |  | 50→232         |  |
|                  |  |  |                   |                                              | Increase in participation            | (35→475)                    |  | —   |  | 505→919        |  |
|                  |  |  |                   | Supervision DMAT Training                    | Securing Participants                | —                           |  | —   |  | 105→120        |  |
|                  |  |  |                   | Skills maintenance training for DMAT members | The number of facilities             | —                           |  | —   |  | 883→1,195      |  |
|                  |  |  |                   |                                              | Participants                         | —                           |  | —   |  | 3,008→3,341    |  |
|                  |  |  | Disaster Training | Disaster Medical Staff Training 1            | Participants                         | —                           |  | —   |  | 79→80→82→68→78 |  |
|                  |  |  |                   | Disaster Medical Staff Training 2            | Participants                         | —                           |  | —   |  | —→29→39→31→32  |  |
|                  |  |  |                   | First Response Medical Team Training         | Participants                         | —                           |  | —   |  | 71→63→65→72→43 |  |
|                  |  |  |                   | Disaster Medical Care Training               | Participants                         | —                           |  | —   |  | 58→71→91→15→71 |  |

| Target item      |  |                                                                             |                                                     |                                                                  |  | Final review of medium-term |  |             |  |                               |  |
|------------------|--|-----------------------------------------------------------------------------|-----------------------------------------------------|------------------------------------------------------------------|--|-----------------------------|--|-------------|--|-------------------------------|--|
| Medium-term plan |  |                                                                             |                                                     |                                                                  |  | 1st                         |  | 2nd         |  | 3rd                           |  |
|                  |  | Assignment of medical assistance personnel                                  | Staffing Hospitals                                  | Increase in the number of staffed facilities                     |  | (—→49)                      |  | (49→68)     |  | 68→73                         |  |
|                  |  |                                                                             | The number of Staff                                 | Increase in the number of staffing                               |  | (—→563)                     |  | (563→1,154) |  | 1,154→1,378                   |  |
|                  |  | Secretariat of the Liaison Council for Medical Care of Intractable Diseases | The number of hospitals with administrative offices | Increase in the number of facilities with administrative offices |  | —                           |  | —           |  | —→ 6                          |  |
|                  |  | Support Center for Intractable Disease Consultation                         | The number of hospitals with centers                | Increase in the number of facilities with administrative offices |  | —                           |  | —           |  | 4→ 7                          |  |
|                  |  | Implementation of therapeutic research projects for specific diseases       | The number of patients admitted to hospital         | The number of acceptances                                        |  | —                           |  | —           |  | 1.3M→1.4M→1.4M→1.5M→1.5M      |  |
|                  |  | Project for Research and Treatment of Specific Chronic Childhood Diseases   | The number of patients admitted to hospital         | The number of acceptances                                        |  | —                           |  | —           |  | 76.7K→76.1K→72.4K→73.9K→77.0K |  |

| Target item      |  |  |                               |                                           |                                    | Final review of medium-term |   |     |   |                                        |  |
|------------------|--|--|-------------------------------|-------------------------------------------|------------------------------------|-----------------------------|---|-----|---|----------------------------------------|--|
| Medium-term plan |  |  |                               |                                           |                                    | 1st                         |   | 2nd |   | 3rd                                    |  |
|                  |  |  | Psychiatry                    | Drug dependence                           | Total number of inpatients         |                             | — |     | — | 14.2K→14.1K→12.7K→<br>12.5K→8.9K       |  |
|                  |  |  |                               | Alcohol dependency                        | Total number of inpatients         |                             |   |     |   | 89.4K→82.2K→87.9K→<br>86.1K→86.3K      |  |
|                  |  |  |                               | Psychiatric Emergencies                   | Total number of inpatients         |                             |   |     |   | 6.9K→7.6K→9.0K→3.3K<br>→3.2K           |  |
|                  |  |  |                               | Dementia Medical Center                   | The number of designated hospitals |                             |   |     |   | 8→9→12→13→13→13                        |  |
|                  |  |  | Medical Observation Law Ward  | The number of admissions per day          | Acceptance of hospitalization      |                             |   |     |   | (346.3→408.3)                          |  |
|                  |  |  | Medical Care for Tuberculosis | Total number of inpatients                | Acceptance Implementation          |                             |   |     |   | (564.7K→351.8K)                        |  |
|                  |  |  |                               | of which multidrug-resistant tuberculosis | Acceptance Implementation          |                             |   |     |   | 325.3K→298.7K→275.0K<br>→254.9K→231.2K |  |
|                  |  |  |                               | The number of beds                        | The number of beds                 |                             |   |     |   | 11.5K→9.1K→6.6K→<br>7.6K→7.2K→5.4K     |  |
|                  |  |  |                               | Bed utilization rate                      | Improvement of bed utilization     |                             |   |     |   | 2.2K→2.0K→2.0K→1.9K<br>→1.6K           |  |
|                  |  |  |                               | DOTS implementation rate                  | Promotion of implementation        |                             |   |     |   | (58.7%→53.4%)                          |  |
|                  |  |  |                               |                                           |                                    |                             |   |     |   | 54.0%→52.8%→52.0%→<br>48.7%→49.1%      |  |
|                  |  |  |                               |                                           |                                    |                             |   |     |   | 99.5%→98.2%→98.5%→<br>98.3%→97.8%      |  |

| Target item      |  |                                        |                                              | Final review of medium-term                |               |               |             |
|------------------|--|----------------------------------------|----------------------------------------------|--------------------------------------------|---------------|---------------|-------------|
| Medium-term plan |  |                                        |                                              | 1st                                        | 2nd           | 3rd           |             |
|                  |  | Contribution to Local Medical Services |                                              |                                            |               |               |             |
|                  |  | Regional Critical Paths                | Regional Critical Paths                      | Increase of more than 5 per cent           | —             | 2.1K→3.2K     | 6.6K→8.8K   |
|                  |  | Regional Medical Support Hospital      | Efforts to Designate                         | Increase in the number of hospitals        | (4→33)        | 33→57         | 57→59       |
|                  |  | Rate of referrals                      | Rate of referrals                            | Increase of more than 5 per cent           | (40.5→53.9%)  | (53.9%→64.7%) | 64.7%→78.1% |
|                  |  |                                        | Reverse Referral Rate                        | Increase of more than 5 per cent           | (28.7%→42.7%) | (42.7%→52.6%) | 52.6%→64.1% |
|                  |  | Medical treatment for cancer           | Prefectural cancer treatment center hospital | Increase in the number of center hospitals | (0→2)         | 2→3           | 3→3         |
|                  |  |                                        | Regional cancer treatment base hospital      | Increase in the number of base hospitals   | (11→31)       | 31→35         | 35→33       |
|                  |  |                                        | Regional Cancer Hospital                     | Increase in the number of hospitals        | —             | —             | 0→1         |
|                  |  |                                        | Cancer Genome Medical Cooperation Hospital   | Increase in the number of hospitals        | —             | —             | —→10        |
|                  |  |                                        |                                              |                                            |               |               |             |

| Target item      |  |  |                                             |                                                                    | Final review of medium-term          |                                      |     |                                    |     |                                    |
|------------------|--|--|---------------------------------------------|--------------------------------------------------------------------|--------------------------------------|--------------------------------------|-----|------------------------------------|-----|------------------------------------|
| Medium-term plan |  |  |                                             |                                                                    | 1st                                  |                                      | 2nd |                                    | 3rd |                                    |
|                  |  |  | Response to the Great East Japan Earthquake | Medical Support                                                    | Disaster Medical Assistance Team     | —                                    |     | 340 Team                           |     | —                                  |
|                  |  |  |                                             | The number of emergency patients accepted                          | Implementation of patient acceptance | (584.1K→618.8K→634.5K→627.7K→564.8K) |     | 593.0K→563.7K→560.1K→546.0K→531.3K |     | 533K→537.4K→548.6K→541.2K→536.7K   |
|                  |  |  |                                             | The number of pediatric emergency patients accepted                | Implementation of patient acceptance | (165.1K→169.0K→174.6K→160.3K→139.8K) |     | 161.4K→138.4K→127.8K→130.0K→117.2K |     | 112.9K→114.1K→110.7K→106.4K→101.1K |
|                  |  |  |                                             | The number of hospitalizations after emergency visits              | Implementation of patient acceptance | —                                    |     | 153.4K→159.4K→163.8K→161.4K→161.4K |     | 172.1K→176.8K→181.6K→183.3K→187.1K |
|                  |  |  |                                             | The number of hospitalizations after emergency visits for children | Implementation of patient acceptance | —                                    |     | 24.3K→22.8K→22.0K→20.1K→19.0K      |     | 19.4K→20.2K→21.7K→19.4K→20.8K      |

| Target item      |  |  |                                       |                                                                          |                                                                 | Final review of medium-term |         |                                        |   |                                        |   |
|------------------|--|--|---------------------------------------|--------------------------------------------------------------------------|-----------------------------------------------------------------|-----------------------------|---------|----------------------------------------|---|----------------------------------------|---|
| Medium-term plan |  |  |                                       |                                                                          |                                                                 | 1st                         |         | 2nd                                    |   | 3rd                                    |   |
|                  |  |  | Improvement of emergency medical care | The number of ambulances accepted                                        | Implementation of patient acceptance                            |                             | —       | 134.2K→146.1K→150.8K<br>→154.6K→159.1K | S | 165.6K→176.8K→180.4K<br>→186.8K→194.9K | A |
|                  |  |  |                                       | The number of pediatric emergency patients transported by ambulance      | Implementation of patient acceptance                            |                             | —       | 10.8K→11.0K→11.0K→<br>11.0K→11.5K      |   | 12.0K→12.4K→13.5K→<br>14.3K→15.0K      |   |
|                  |  |  |                                       | The number of hospitalizations after ambulance visits                    | Implementation of patient acceptance                            |                             | —       | 76.3K→82.4K→84.5K→<br>85.9K→87.8K      |   | 92.1K→95.0K→100.1K→<br>104.6K→106.8K   |   |
|                  |  |  |                                       | The number of children hospitalized after being transported by ambulance | Implementation of patient acceptance                            |                             | —       |                                        | — | 4.2K→4.6K→4.7K→4.9K<br>→4.9K           |   |
|                  |  |  |                                       | Emergency and critical care center                                       | Increase in the number of hospitals with administrative offices |                             | (14→17) | 17→18                                  |   | 18→20                                  |   |
|                  |  |  |                                       | 24-hour pediatric emergency system                                       | Increase in the number of hospitals with systems in place       |                             | (11→17) | 17→15                                  |   | 15→17                                  |   |

| Target item      |  |  |                                                        |                                  | Final review of medium-term          |   |     |               |     |               |
|------------------|--|--|--------------------------------------------------------|----------------------------------|--------------------------------------|---|-----|---------------|-----|---------------|
| Medium-term plan |  |  |                                                        |                                  | 1st                                  |   | 2nd |               | 3rd |               |
|                  |  |  | Medical Center for Intractable Diseases                | The number of Hospitals          | Establishment                        | — |     | —             |     | 28→26         |
|                  |  |  | Cooperative Medical Hospitals for Intractable Diseases | The number of Hospitals          | Establishment                        | — |     | —             |     | 61→55         |
|                  |  |  | Medical Observation Law Ward                           | Hospitals with established wards | Increase in the number of hospitals  | — |     | 12→14         |     | —             |
|                  |  |  |                                                        | The number of beds               | Securing the number of beds          | — |     | 359→421       |     | —             |
|                  |  |  |                                                        | The number of admissions per day | Acceptance of hospitalization        | — |     | 346.3→408.3   |     | Reclassified. |
|                  |  |  | Medical Care for Tuberculosis                          | Total number of inpatients       | Implementation of patient acceptance | — |     | 564.7K→351.8K |     | Reclassified. |
|                  |  |  |                                                        | Bed utilization rate             | Improvement of bed utilization rate  | — |     | 58.7%→53.4%   |     | Reclassified. |
|                  |  |  | Generic drug                                           | Utilization rate based on volume | Increase in utilization rate         | — |     | 16.4%→33.5%   |     | Reclassified. |
|                  |  |  |                                                        | Utilization rate in value terms  | Increase in utilization rate         | — |     | 8.3%→10.0%    |     | —             |

| Target item      |                                                                                        |                                                 |                                              | Final review of medium-term |                       |                                                   |  |
|------------------|----------------------------------------------------------------------------------------|-------------------------------------------------|----------------------------------------------|-----------------------------|-----------------------|---------------------------------------------------|--|
| Medium-term plan |                                                                                        |                                                 |                                              | 1st                         | 2nd                   | 3rd                                               |  |
|                  | Clinical Research Business                                                             |                                                 |                                              |                             |                       |                                                   |  |
|                  | Promotion of Large-Scale Clinical Research                                             | The number of Tasks                             | End                                          | 9                           | —                     | 7                                                 |  |
|                  |                                                                                        |                                                 | Continue                                     | 5                           | 30                    | 22                                                |  |
|                  | Efforts against the New Influenza Pandemic                                             | Goals to be achieved in vaccine clinical trials | 370 cases                                    | Achieved in 1 month         | —                     | —                                                 |  |
|                  |                                                                                        | The number of clinical studies                  |                                              | —                           | 5                     | —                                                 |  |
|                  | Acquisition of policy-designated research at the Ministry of Health, Labor and Welfare | The number of Tasks                             |                                              | 11                          | —                     | —                                                 |  |
|                  | Academic Activities                                                                    | English original papers                         | The number of papers (more than 5% increase) | —                           | 1.3K→1.9K             | 2.1K→2.3K→2.4K→2.5K→2.6K                          |  |
|                  |                                                                                        | The original paper in Japanese                  | The number of Papers                         | —                           | 1.6K→1.7K             | 1.7K→1.8K→1.7K→1.7K→1.5K                          |  |
|                  |                                                                                        | Presentations at International Conferences      | The number of presentations                  | —                           | 0.6K→1.2K             | 1.2K→1.1K→1.4K→1.5K→1.4K                          |  |
|                  |                                                                                        | Presentations at Domestic Conferences           | The number of presentations                  | —                           | 11.1K→19.0K           | 21.0K→21.0K→20.4K→19.6K→18.7K                     |  |
|                  | Obtaining research funding                                                             | Obtaining research funding                      | Increase in research expenses                | (US\$16.3M→US\$24.5M)       | (US\$24.5M→US\$24.7M) | US\$29.5M→US\$30.5M→US\$30.6M→US\$30.5M→US\$26.6M |  |

| Target item      |                                                 |                                                          |                                                                  |                     | Final review of medium-term |                     |     |                     |     |  |
|------------------|-------------------------------------------------|----------------------------------------------------------|------------------------------------------------------------------|---------------------|-----------------------------|---------------------|-----|---------------------|-----|--|
| Medium-term plan |                                                 |                                                          |                                                                  |                     | 1st                         |                     | 2nd |                     | 3rd |  |
|                  | Clinical Trials                                 | The number of hospitals with clinical trial coordinators | Increase in the number of facilities with administrative offices | 27→64               | S                           | 64→70               | S   | 70                  | A   |  |
|                  |                                                 | The number of clinical trial coordinators                | Increase in the number of staff assigned                         | 54→153              |                             | 153→209             |     | 209→245             |     |  |
|                  |                                                 | The number of Clinical Trials                            | Increase in the number of cases                                  | 2.8K→4.3K           |                             | 4.3K→4.2K           |     | 4.8K→3.9K           |     |  |
|                  |                                                 | Sales from Clinical Trials                               | Increase in sales amount                                         | US\$32.6M→US\$43.9M |                             | US\$43.9M→US\$41.6M |     | US\$45.5M→US\$42.3M |     |  |
|                  | Restructuring of Clinical Research Organization | Clinical Research Center                                 | The number of Centers                                            | —                   | 10→12                       | 12→10               |     |                     |     |  |
|                  |                                                 | Clinical Research Division                               | The number of Clinical Research Divisions                        | —                   | 60→71                       | 71→77               |     |                     |     |  |
|                  |                                                 | Clinical Research Division (in-house advocates)          | The number of clinical Research Division (in-house advocates)    | —                   | 43→47                       | 47→45               |     |                     |     |  |

| Target item      |  |                                  |                                                  |                            | Final review of medium-term |  |               |  |             |
|------------------|--|----------------------------------|--------------------------------------------------|----------------------------|-----------------------------|--|---------------|--|-------------|
| Medium-term plan |  |                                  |                                                  |                            | 1st                         |  | 2nd           |  | 3rd         |
|                  |  | Ethics Review Board              | The number of times held, number of examinations | The number of times held   | (382→628)                   |  | (628→893)     |  | 893→982     |
|                  |  |                                  |                                                  | The number of examinations | (1.2K→2.4K)                 |  | (2.4K→4.7K)   |  | 4.7K→7.2K   |
|                  |  | Clinical Trials Review Committee | The number of times held, number of examinations | The number of times held   | (—→1.1K)                    |  | (1.1K→1.0K)   |  | 1.0K→1.0K   |
|                  |  |                                  |                                                  | The number of examinations | (—→14.0K)                   |  | (14.0K→14.8K) |  | 14.8K→21.1K |
|                  |  | COI Review Committee             | The number of times held, number of examinations | The number of times held   | —                           |  | —             |  | 343→423     |
|                  |  |                                  |                                                  | The number of examinations | —                           |  | —             |  | 2.2K→3.2K   |

| Target item      |                                 |                                                    |                                            |                                                        | Final review of medium-term     |   |         |   |                     |   |
|------------------|---------------------------------|----------------------------------------------------|--------------------------------------------|--------------------------------------------------------|---------------------------------|---|---------|---|---------------------|---|
| Medium-term plan |                                 |                                                    |                                            |                                                        | 1st                             |   | 2nd     |   | 3rd                 |   |
|                  | Education and Training Business |                                                    |                                            |                                                        |                                 | A |         | S |                     | B |
|                  | Physician Training              | Junior Residents.                                  | Increase in the number of accepted         | 559→713                                                | 713→725                         |   | 725→922 |   |                     |   |
|                  |                                 |                                                    | Senior Residents                           | Increase in the number of accepted                     | 799→816                         |   | 802→845 |   | 845→909             |   |
|                  |                                 |                                                    |                                            | Training workshops for clinical internship supervisors | Increase in the number of times |   | 5→5     |   | —                   |   |
|                  |                                 |                                                    | Increase in participation                  |                                                        | 177→190                         |   | —       |   | 146→188→177→177→127 |   |
|                  |                                 | Assignment of a full-time Education Division Chief | Increase in the number of facilities       | 0→45                                                   | 45→103                          |   | 103→120 |   |                     |   |
|                  |                                 |                                                    | The number of specialized/certified nurses | The number of Hospitals Assigned                       | 39→81                           |   | 86→119  |   | Reclassified.       |   |
|                  |                                 |                                                    |                                            | Increase in the number of staff assigned               | 74→285                          |   | 258→686 |   | Reclassified.       |   |
|                  |                                 |                                                    | Training of Practice Leaders               | The number of facilities where the event was held      | 1 →6                            |   | 6→6     |   | —                   |   |
|                  | The number of Lecturers         | 52→261                                             |                                            | 261→245                                                | 245→222                         |   |         |   |                     |   |
|                  | registered nurse                |                                                    |                                            |                                                        |                                 |   |         |   |                     |   |
|                  |                                 |                                                    |                                            |                                                        |                                 |   |         |   |                     |   |
|                  |                                 |                                                    |                                            |                                                        |                                 |   |         |   |                     |   |
|                  |                                 |                                                    |                                            |                                                        |                                 |   |         |   |                     |   |
|                  |                                 |                                                    |                                            |                                                        |                                 |   |         |   |                     |   |
|                  |                                 |                                                    |                                            |                                                        |                                 |   |         |   |                     |   |
|                  |                                 |                                                    |                                            |                                                        |                                 |   |         |   |                     |   |

| Target item      |  |                                                        |                                              |                                        | Final review of medium-term |  |           |  |                 |
|------------------|--|--------------------------------------------------------|----------------------------------------------|----------------------------------------|-----------------------------|--|-----------|--|-----------------|
| Medium-term plan |  |                                                        |                                              |                                        | 1st                         |  | 2nd       |  | 3rd             |
|                  |  |                                                        | Scholarship Loans                            | The number of people loaned            | 20→131                      |  | 131→1,876 |  | Reclassified.   |
|                  |  |                                                        |                                              | The number of loan recipients employed | 14→53                       |  | 53→761    |  | Reclassified.   |
|                  |  |                                                        | The pass rate of national examinations       | OIST Specialty Schools                 | 98%                         |  | 98.5%     |  | 98.4%           |
|                  |  |                                                        |                                              | National Average                       | 92.7%                       |  | 94.9%     |  | 95.1%           |
|                  |  | Midwife                                                | The pass rate of national examinations       | Professional school in OIST            | —                           |  | 98.2%     |  | 99.8%           |
|                  |  |                                                        |                                              | National Average                       | —                           |  | 94.8%     |  | 98.4%           |
|                  |  | DMAT Training                                          | The number of Hospitals Conducting Training  | Increase of hospitals                  | 7→119                       |  | —         |  | Reclassified.   |
|                  |  |                                                        |                                              | Increase in participation              | 35→475                      |  | —         |  | Reclassified.   |
|                  |  | Medical Training in the Community                      | The number of community health care training | Increase of 15% or more                | —                           |  | 2.2K→3.5K |  | 4.7K→5.2K       |
|                  |  | Training to improve the quality and standardization of | Participants in the training                 | Participant                            | —                           |  | —         |  | 103→76→75→57→81 |

| Target item                                                   |                                                           |                                                              |                                               | Final review of medium-term |     |                     |  |
|---------------------------------------------------------------|-----------------------------------------------------------|--------------------------------------------------------------|-----------------------------------------------|-----------------------------|-----|---------------------|--|
| Medium-term plan                                              |                                                           |                                                              |                                               | 1st                         | 2nd | 3rd                 |  |
| II . Matters related to the efficiency of business management |                                                           |                                                              |                                               |                             |     |                     |  |
|                                                               | Efficient Business Operation Structure                    |                                                              |                                               |                             |     |                     |  |
|                                                               | Training to improve hospital management strategy capacity | Training 1. to improve hospital management strategy capacity | Participant                                   | —                           | —   | 141→137→116→201→194 |  |
|                                                               |                                                           | Training 2. to improve hospital management strategy capacity | Participant                                   | —                           | —   | 139→164→127→232→225 |  |
|                                                               | Compliance                                                | Voluntary compliance inspections                             | All hospitals                                 | —                           | —   | 137→All hospitals   |  |
|                                                               | Implementation of management guidance                     | The number of Implementation of management guidance          | The number of hospitals                       | 13→28→23                    | —   | —                   |  |
|                                                               | Reduction of staff numbers                                | Reduction of technical staff                                 | No supplement                                 | 1207                        | 875 | Reclassified.       |  |
|                                                               | Outsourcing                                               | Clinical Laboratory                                          | The number of hospitals that have implemented | 3→8                         | 7   | —                   |  |
|                                                               |                                                           | Food preparation                                             | The number of hospitals that have implemented | 5→8                         | 17  | —                   |  |

| Target item      |  |                                              |                                                                 |                                    | Final review of medium-term |   |               |   |               |  |
|------------------|--|----------------------------------------------|-----------------------------------------------------------------|------------------------------------|-----------------------------|---|---------------|---|---------------|--|
| Medium-term plan |  |                                              |                                                                 |                                    | 1st                         |   | 2nd           |   | 3rd           |  |
|                  |  | Introduction of staff performance evaluation | All hospitals                                                   | All hospitals                      | all hospitals               | A | all hospitals | A | all hospitals |  |
|                  |  |                                              | Bonuses linked to management performance                        | All hospitals                      | all hospitals               |   | all hospitals |   |               |  |
|                  |  | End-of-year bonus                            | Implementation of end-of-year bonuses at hospitals in the black | The number of hospitals            | 42→30→28→62→56              |   | Reclassified. |   |               |  |
|                  |  | Reduction of training schools                | Nurses                                                          | Reduction of training schools      | 68→42                       |   | —             |   | —             |  |
|                  |  |                                              | Midwife                                                         | Reduction of training schools      | 5→5                         |   | —             |   | —             |  |
|                  |  |                                              | Rehabilitation                                                  | Reduction of training schools      | 6→1                         |   | —             |   | —             |  |
|                  |  |                                              | Vision Trainer                                                  | Reduction of training schools      | 1→1                         |   | —             |   | —             |  |
|                  |  | Consolidation of hospitals                   | Hospital consolidation (up to 10 locations)                     | The number of integrated hospitals | 8                           |   | 2             |   |               |  |
|                  |  |                                              | Abolished                                                       | The number of hospitals eliminated | 1                           |   | —             |   | —             |  |

| Target item      |                                                       |                                                                 |                                     |                  | Final review of medium-term |  |        |  |     |  |
|------------------|-------------------------------------------------------|-----------------------------------------------------------------|-------------------------------------|------------------|-----------------------------|--|--------|--|-----|--|
| Medium-term plan |                                                       |                                                                 |                                     |                  | 1st                         |  | 2nd    |  | 3rd |  |
|                  | Improvement of Efficiency of Business Operation, etc. |                                                                 |                                     |                  |                             |  |        |  |     |  |
|                  | Achievement of profitability                          | The number of hospitals in the black                            | Increase in the number of hospitals | —                | 111→122→117→123→113         |  | —      |  |     |  |
|                  |                                                       | The number of deficit hospitals                                 | Decrease in the number of hospitals | —                | 31→20→25→19→29              |  | —      |  |     |  |
|                  | Year-end bonus                                        | Implementation of end-of-year bonuses at hospitals in the black | The number of hospitals             | (42→30→28→62→56) | 57→117→102→98→92            |  | —      |  |     |  |
|                  | Efficiency of hospital beds                           | General hospital beds                                           | The number of beds reduced          | —                | 861                         |  | —      |  |     |  |
|                  |                                                       | Beds for tuberculosis                                           | The number of beds reduced          | —                | 665                         |  | —      |  |     |  |
|                  |                                                       | Beds for Mental Illness                                         | The number of beds reduced          | —                | 276                         |  | —      |  |     |  |
|                  | Training in Medical Affairs                           | Ensure the number of participants                               | Ensure the number of participants   | —                | 127→134                     |  | 121→92 |  |     |  |

| Target item      |  |                                             |                                           |                                       | Final review of medium-term |   |                     |   |         |   |
|------------------|--|---------------------------------------------|-------------------------------------------|---------------------------------------|-----------------------------|---|---------------------|---|---------|---|
| Medium-term plan |  |                                             |                                           |                                       | 1st                         |   | 2nd                 |   | 3rd     |   |
|                  |  | Training for proper billing of medical fees | Ensure the number of participants         | Ensure the number of participants     | —                           | A | —                   | A | 121→125 | B |
|                  |  | Hospital Management Training Program        | Ensure the number of participants         | Ensure the number of participants     | —                           |   | 280→138             |   | —       |   |
|                  |  | Implementation of joint bidding             | The number of participating hospitals     | The number of participating hospitals | 101→all hospitals           |   | —                   |   | —       |   |
|                  |  |                                             | Types of Drugs                            | Increase of items                     | 5.9K→13.6K                  |   | —                   |   | —       |   |
|                  |  | Inventory assets                            | Assets (Pharmaceuticals)                  | Reduction                             | US\$31.6M→US\$29.2M         |   | US\$29.2M→US\$40.3M |   | —       |   |
|                  |  |                                             | Inventory turnover days (Pharmaceuticals) | Reduction                             | 14.2 days→11.9 days         |   | 11.9 days→13.0 days |   | —       |   |
|                  |  |                                             | Assets (medical supplies)                 | Reduction                             | US\$28.2M→US\$17.4M         |   | US\$17.4M→US\$14.9M |   | —       |   |
|                  |  |                                             | Inventory turnover (medical supplies)     | Reduction                             | 20.3 days→11.2 days         |   | 11.2 days→8.2 days  |   | —       |   |

| Target item      |  |                                      |                                                                                 |                                     | Final review of medium-term |                                   |     |                                   |                                   |
|------------------|--|--------------------------------------|---------------------------------------------------------------------------------|-------------------------------------|-----------------------------|-----------------------------------|-----|-----------------------------------|-----------------------------------|
| Medium-term plan |  |                                      |                                                                                 |                                     | 1st                         |                                   | 2nd |                                   | 3rd                               |
|                  |  | Supply Processing Distribution; SPD  | The number of hospitals introduced                                              | Increase in the number of hospitals |                             | —                                 |     | 77→88                             | —                                 |
|                  |  | Material Cost Ratio                  | Material Rates                                                                  | Maintain or control                 |                             | —                                 |     | 24.0%→24.3%                       | —                                 |
|                  |  | The number of surgeries              | No reduction in the number of surgeries while keeping inventories under control | Maintaining or increasing           |                             | 158.9K→174.3K                     |     | —                                 | —                                 |
|                  |  | Personnel rate + Commissioning rate  | Control Personnel rate + Commissioning rate                                     | Plan                                |                             | 59.1%→58.6%→58.8%→<br>58.2%→58.3% |     | —                                 |                                   |
|                  |  |                                      |                                                                                 | Actual value                        |                             | 58.8%→57.8%→58.1%→<br>57.4%→57.0% |     | 57.4%→55.3%→55.8%→<br>55.3%→55.4% | 56.3%→58.7%→59.4%→<br>59.2%→58.8% |
|                  |  | Reduction of administrative expenses | Reduce administrative costs                                                     | Decrease in amount                  |                             | US\$33.4M→US\$31.0M               |     | —                                 | —                                 |
|                  |  |                                      | General Management Fee                                                          | 5% reduction                        |                             | —                                 |     | US\$6.8M→US\$5.2M                 | US\$4.9M→US\$6.0M                 |
|                  |  | Reduction of labour costs            | Reduce labour costs                                                             |                                     |                             | US\$2.8B→US\$2.9B                 |     | US\$3.1B(FY2011)                  | —                                 |

| Target item      |                                                                                |                                            |                            |                                 | Final review of medium-term |   |               |   |               |  |   |  |
|------------------|--------------------------------------------------------------------------------|--------------------------------------------|----------------------------|---------------------------------|-----------------------------|---|---------------|---|---------------|--|---|--|
| Medium-term plan |                                                                                |                                            |                            |                                 | 1st                         |   | 2nd           |   | 3rd           |  |   |  |
|                  | Effective Utilization of Medical Resources                                     |                                            |                            |                                 |                             | S |               | S |               |  |   |  |
|                  |                                                                                | The number of medical devices in operation | CT                         | Increase in the number of cases | 759.1K→944.9K               |   | 944.9K→1.1M   |   |               |  |   |  |
|                  |                                                                                |                                            | MRI                        | Increase in the number of cases | 280.6K→381.6K               |   | 381.6K→434.9K |   |               |  |   |  |
|                  |                                                                                |                                            | Gamma cameras              | Increase in the number of cases | 102.5K→82.4                 |   | —             |   |               |  |   |  |
|                  |                                                                                |                                            | Per CT unit                | Increase in the number of cases | 4.1K→5.3K                   |   | 5.3K→5.9K     |   |               |  |   |  |
|                  |                                                                                |                                            | Per MRI unit               | Increase in the number of cases | 2.2K→2.8K                   |   | 2.8K→2.9K     |   |               |  |   |  |
|                  |                                                                                |                                            | Per Gamma camera unit      | Increase in the number of cases | 1.0K→2.8K                   |   | —             |   |               |  |   |  |
|                  |                                                                                | Joint use with other institutions          | CT                         | Increase in the number of cases | 13.5K→28.5K                 |   | 28.5K→36.0K   |   |               |  |   |  |
|                  |                                                                                |                                            | MRI                        | Increase in the number of cases | 11.4K→27.6K                 |   | 27.6K→36.7K   |   |               |  |   |  |
|                  |                                                                                |                                            | Gamma camera               | Increase in the number of cases | 3.4K→2.9K                   |   | —             |   |               |  |   |  |
|                  | Investment in medical equipment                                                | Investment Limit US\$454.5M                | Actual amount              | US\$637.3M                      | Reclassified.               |   |               |   |               |  |   |  |
|                  | Investment                                                                     | Investment Limit US\$1.3B                  | Actual amount              | US\$1.2B                        | Reclassified.               |   |               |   |               |  |   |  |
|                  | Reduction of Expenses Related to Businesses Other Than Clinical Services, etc. |                                            |                            |                                 |                             |   | A             |   |               |  | — |  |
|                  |                                                                                | Obtaining research funding                 | Obtaining research funding | Increase in research expenses   | US\$16.3M→US\$24.5M         |   |               |   | Reclassified. |  |   |  |

| Target item      |                                               |                                                                 |                                   | Final review of medium-term |   |                     |   |                               |
|------------------|-----------------------------------------------|-----------------------------------------------------------------|-----------------------------------|-----------------------------|---|---------------------|---|-------------------------------|
| Medium-term plan |                                               |                                                                 |                                   | 1st                         |   | 2nd                 |   | 3rd                           |
|                  | Promotion of Information Technology           |                                                                 |                                   |                             | A |                     | — |                               |
|                  | Implementation of financial accounting system | Introduction of the system                                      | Introduction of the system        | Already in place            |   | —                   |   | —                             |
|                  |                                               | Introduction of electronic medical records                      | The number of hospitals with EMRs | —                           |   | —                   |   | 91→102→104→110→114            |
|                  | Securing Revenue                              |                                                                 |                                   |                             | — |                     | A |                               |
|                  | Accounts Receivable Measures                  | Percentage of accounts receivable                               | Less than 0.11 per cent           | —                           |   | 0.11%→0.04%         |   | —                             |
|                  |                                               | The ratio of accounts receivable balance to medical revenue     | Percentage Reduction              | —                           |   | —                   |   | 0.16%→0.16%→0.15%→0.15%→0.14% |
|                  | Loan of assets held                           | Visiting nurse stations, etc.                                   | Loan                              | —                           |   | —                   |   | 7→9→12→13→15                  |
|                  |                                               | Employment support business for persons with disabilities, etc. | Loan                              | —                           |   | —                   |   | 5→5→6→7→8                     |
|                  |                                               | University of Nursing Sciences                                  | Loan                              | —                           |   | —                   |   | 8→10→14→16→18                 |
|                  | Obtaining research funding                    | Obtaining research funding                                      | Increase in research expenses     | (US\$16.3M→US\$24.5M)       |   | US\$24.5M→US\$24.7M |   | Reclassified.                 |

| Target item                                             |                                                        |                                                                                   |                                                                |                                                                | Final review of medium-term |                                                                |     |                                                               |
|---------------------------------------------------------|--------------------------------------------------------|-----------------------------------------------------------------------------------|----------------------------------------------------------------|----------------------------------------------------------------|-----------------------------|----------------------------------------------------------------|-----|---------------------------------------------------------------|
| Medium-term plan                                        |                                                        |                                                                                   |                                                                |                                                                | 1st                         | 2nd                                                            | 3rd |                                                               |
| III. Matters Related to Improvement of Financial Status |                                                        |                                                                                   |                                                                |                                                                |                             |                                                                |     |                                                               |
|                                                         | Budget, Income and Expenditure Plan and Financial Plan |                                                                                   |                                                                |                                                                | —                           | —                                                              | —   |                                                               |
|                                                         | Improvement of Management                              |                                                                                   |                                                                |                                                                |                             | US\$352.7M→                                                    |     |                                                               |
|                                                         | Achievement of profitability                           | Current account balance                                                           | Current account surpluses                                      | Full-year achievement                                          | S                           | US\$352.7M→US\$530.0M→<br>US\$416.4M→US\$452.7M→<br>US\$288.1M | A   | US\$135.5M→US\$7.3M<br>→US\$-61.8M→US\$-<br>20.0M→US\$76.3M   |
|                                                         |                                                        | total receipts and expenditure (disbursement)                                     | US\$316.4M→US\$450.0M→<br>US\$-916.4M→US\$380.9M<br>→US\$19.1M | US\$316.4M→US\$450.0M<br>→US\$-916.4M→<br>US\$380.9M→US\$19.1M |                             | US\$316.4M→US\$450.0M<br>→US\$-916.4M→<br>US\$380.9M→US\$19.1M |     | US\$106.4M→US\$11.8M<br>→US\$-146.4M→<br>US\$-72.7M→US\$16.4M |
|                                                         | Improvement of Fixed Liabilities Ratio                 |                                                                                   |                                                                |                                                                |                             | US\$19.1M                                                      |     |                                                               |
|                                                         | Investment                                             | Total of Investment Limit; 1st: US\$1.3B, 2nd: US\$3.1B, 3rd: US\$4.2B            | Actual amount                                                  | (US\$1.2B)                                                     | S                           | US\$3.0B                                                       | S   | US\$3.0B                                                      |
|                                                         |                                                        | Investment Limit for Medical Equipment; 1st: US\$454.5M, 2nd: US\$1.0B, 3rd: 1.4B | Actual amount                                                  | (US\$637.3M)                                                   |                             | US\$1.2B                                                       |     | US\$0.9B                                                      |
|                                                         |                                                        | Investment Limit for Facility; 2nd: US\$2.0B, 2rd: US\$2.8B                       | Actual amount                                                  | —                                                              |                             | US\$1.7B                                                       |     | US\$2.1B                                                      |
|                                                         | Fiscal Investment and Loan Borrowing; FILP system      | Borrowing Amount                                                                  | Actual value                                                   | —                                                              |                             | US\$580M                                                       |     | US\$1.8B                                                      |
|                                                         | Fixed liabilities amount                               | Reduction of fixed liabilities                                                    | Reduction of fixed liabilities                                 | US\$6.8B→US\$5.4B                                              |                             | US\$5.4B→US\$3.9B                                              |     | US\$3.9B→S\$4.5B                                              |

B

| Target item       |                                                                                                        |                                         |                                                                                     |             | Final review of medium-term |             |   |                     |   |
|-------------------|--------------------------------------------------------------------------------------------------------|-----------------------------------------|-------------------------------------------------------------------------------------|-------------|-----------------------------|-------------|---|---------------------|---|
| Medium-term plan  |                                                                                                        |                                         |                                                                                     |             | 1st                         | 2nd         |   | 3rd                 |   |
| IV. Other matters |                                                                                                        |                                         |                                                                                     |             |                             |             |   |                     |   |
|                   | Other Matters Concerning Business Operation as Provided for in the Ordinance of the Competent Ministry |                                         |                                                                                     |             |                             |             |   |                     |   |
|                   | Registered nurse                                                                                       | Scholarship Loans                       | The number of loan recipients                                                       | (20→131)    | A                           | (131→1,876) | A | 745→822→782→710→613 | B |
|                   |                                                                                                        |                                         | The number of loan recipients in employment                                         | (14→53)     |                             | (53→761)    |   | 734→794→738→644→555 |   |
|                   | Employment of nursing students from affiliated nursing schools                                         | Retention of nurses                     | Improvement of employment rate                                                      | 56.7%→67.3% |                             | —           |   |                     |   |
|                   | Employment of the physically challenged                                                                | Employment of persons with disabilities | Achievement of legal employment rate (2.1%, after FY2013: 2.3%, after FY2018: 2.5%) | 1.68%→2.42% |                             | 2.42%→2.11% |   | 2.49%               |   |
|                   | Reduction of staff numbers                                                                             | Reduction of technical staff            | Non-supplementation                                                                 | (1207)      |                             | (875)       |   | 543                 |   |
